CELL SCIENCE AT A GLANCE

# Galectins at a glance

Ludger Johannes<sup>1,\*</sup>, Ralf Jacob<sup>2,\*</sup> and Hakon Leffler<sup>3,\*</sup>

**ABSTRACT**

Galectins are carbohydrate-binding proteins that are involved in many physiological functions, such as inflammation, immune responses, cell migration, autophagy and signalling. They are also linked to diseases such as fibrosis, cancer and heart disease. How such a small family of only 15 members can have such widespread effects remains a conundrum. In this Cell Science at a Glance article, we summarise recent literature on the many cellular activities that have been ascribed to galectins. As shown on the accompanying poster, these include carbohydrate-independent interactions with cytosolic

or nuclear targets and carbohydrate-dependent interactions with extracellular glycoconjugates. We discuss how these intra- and extracellular activities might be linked and point out the importance of unravelling molecular mechanisms of galectin function to gain a true understanding of their contributions to the physiology of the cell. We close with a short outlook on the organismal functions of galectins and a perspective on the major challenges in the field.

**KEY WORDS:** Endocytosis, Galectin, Glycosylation

**Introduction**

Galectins were discovered based on their galactoside binding activity, in a quest to find proteins that decode complex cell-surface glycans. They were defined as a protein family based on conserved β-galactoside-binding sites found within their characteristic ~130 amino acid (aa) carbohydrate recognition domains (CRDs) (Barondes et al., 1994). However, it was soon realised that galectins are synthesised as cytosolic proteins, reside in the cytosol or nucleus for much of their lifetime and reach their galactoside ligands only after non-classical secretion that bypasses

<sup>1</sup>Institut Curie, PSL Research University, Cellular and Chemical Biology unit, U1143 INSERM, UMR3666 CNRS, 26 rue d'Ulm, 75248 Paris Cedex 05, France. <sup>2</sup>Philipps-Universität Marburg, Institut für Zytobiologie, Robert-Koch-Str. 6, 35037 Marburg, Germany. <sup>3</sup>Sect. MIG (Microbiology, Immunology, Glycobiology), Dept Laboratory Medicine, Lund University, POB 117, 22100 Lund, Sweden.

\*Authors for correspondence (ludger.johannes@curie.fr; jacob@staff.uni-marburg.de; hakon.leffler@med.lu.se)

L.J., 0000-0002-2168-0004

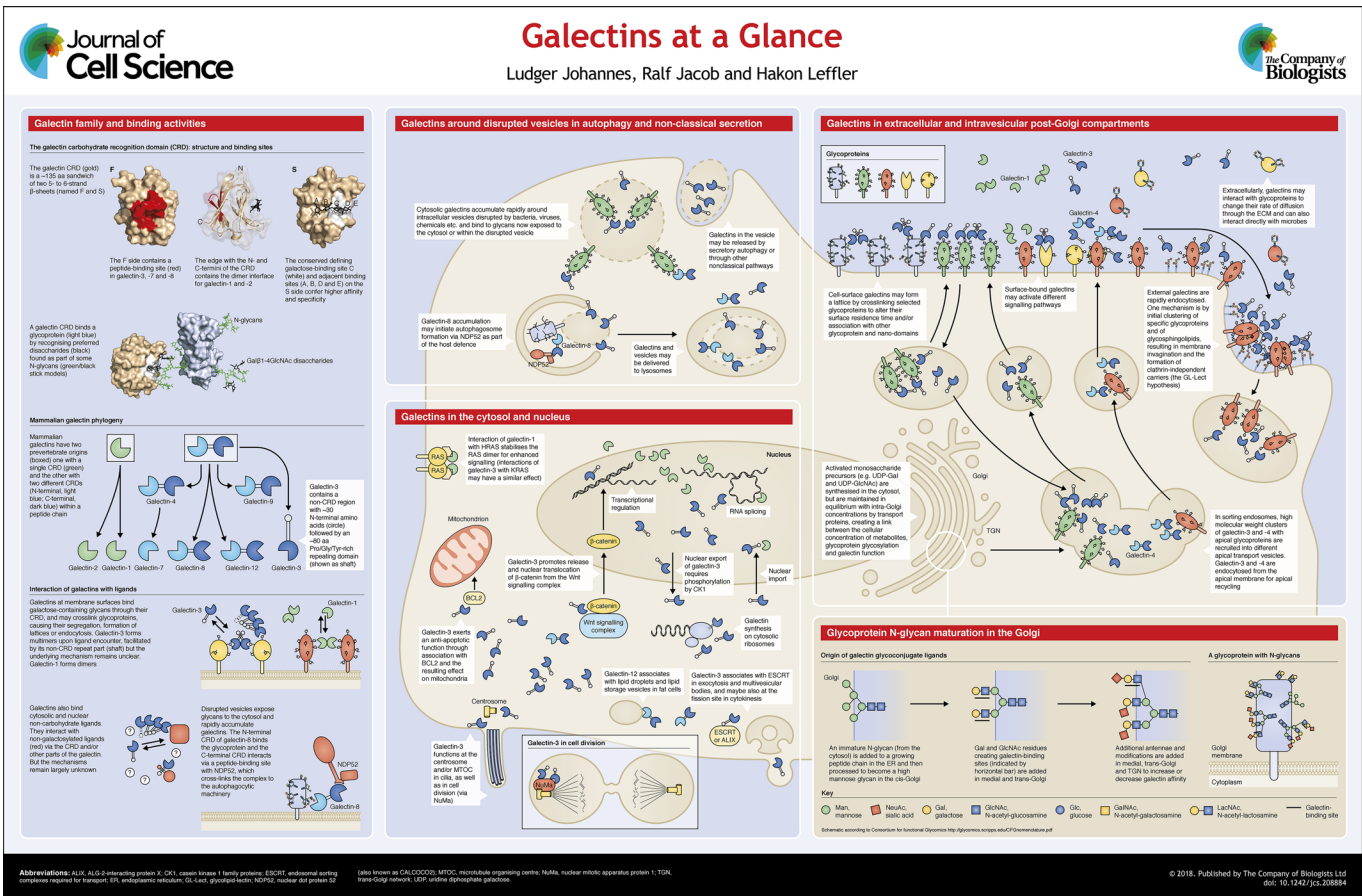

the Golgi complex (Cummings et al., 2015). Indeed, galectins also interact with various non-galactose-containing binding partners, and their CRDs (or other parts) also have non-carbohydrate binding sites (Kim et al., 2013; Li et al., 2013) (see poster). While all cells express galectins, sometimes at cytosolic concentrations as high as 5  $\mu$ M (Lindstedt et al., 1993), the expression pattern varies between cell types and tissues (Table 1).

Galectins are small soluble proteins that contain one or two CRDs but no other types of folded protein domains (Hirabayashi and Kasai, 1993). A core set of mammalian galectins are conserved from earlier vertebrate species, these comprise the 'prototype' galectin-1, -2 and -7, which contain one CRD, the chimeric galectin-3, and galectin-4, -8, -9 and -12, which are tandem repeat galectins with two CRDs (Houzelstein et al., 2004). Other galectins and galectin-related proteins are listed in Table 1.

Here, and in the accompanying poster, we exemplify the binding activities of galectins and their cytosolic and nuclear functions, as well as their capacity to: (1) recognise disrupted endosomal membranes; (2) be secreted via the non-classical pathway; and (3) modulate the activity of glycoproteins at the cell surface and inside the lumen of intracellular compartments. Because of space limitations, the focus of this article is on their cellular activities

with the goal of stimulating interest in the interplay between intra- and extracellular galectin activities, and on the best studied galectins, mainly in human and mouse. We highlight how the understanding of molecular mechanisms will be critical to obtain confirmed models of galectin function. The organismal functions of galectins are only briefly summarised, including their tissue distribution (Table 1) and small molecule inhibitors (Box 1). A more detailed description of the carbohydrate structures to which galectins bind (Boxes S1 and S2) and of the main defects that are observed in galectin knockout mice (Table S1) are presented in the supplementary material.

### Binding activities of galectins

The galectin CRD folds as a slightly bent  $\beta$ -sandwich (Di Lella et al., 2011; Leffler et al., 2004) (see poster). The concave S side forms a shallow groove that can approximately hold a tetrasaccharide (labelled A-B-C-D on the poster and Fig. S1). The defining galactose-binding site (C) that is conferred by a conserved sequence motif of about seven amino acids is localised within this groove. Weaker sites on either side of the galactose-binding site (including site E shown on the poster) enhance or decrease binding, thereby giving each galectin CRD its unique specificity and higher

**Table 1. Tissue and species distribution of galectins and galectin-related proteins**

| Galectin                            | Tissue distribution in human and rodents                                                                   | Species (closest relative <sup>a</sup> )       | Reference                                                                              |
|-------------------------------------|------------------------------------------------------------------------------------------------------------|------------------------------------------------|----------------------------------------------------------------------------------------|
| Galectin-1                          | Expressed in many tissues and cell types                                                                   | Vertebrates                                    | Cooper, 2002                                                                           |
| Galectin-2                          | Gastrointestinal tract, placenta                                                                           | Birds and mammals, frogs, lizards (galectin-1) | Hutter et al., 2015; Oka et al., 1999                                                  |
| Galectin-3                          | Expressed in many tissues and cell types, especially prominent in macrophages and epithelial cells         | Vertebrates                                    | Cooper, 2002                                                                           |
| Galectin-4                          | Intestine and stomach, uterine epithelial cells, blood vessel walls, hippocampal and cortical neurons      | Vertebrates, except most birds                 | Froehlich et al., 2012; Huflejt and Leffler, 2004; Velasco et al., 2013                |
| Galectin-5                          | Lung, kidney, reticulocytes, bone marrow, erythrocytes                                                     | Rat (galectin-9, C-CRD)                        | Cerra et al., 1985; Gitt et al., 1995; Lensch et al., 2006                             |
| Galectin-6                          | Gastrointestinal tract, liver, kidney, spleen, heart                                                       | Some mouse strains (galectin-4)                | Gitt et al., 1998; Houzelstein et al., 2008; Houzelstein et al., 2013                  |
| Galectin-7                          | Gastrointestinal tract, stratified epithelia, skin, fetal heart                                            | Mammals (galectin-4, N-CRD)                    | Magnaldo et al., 1998; Sato et al., 2002; Timmons et al., 1999                         |
| Galectin-8                          | Liver, kidney, cardiac muscle, lung, and brain                                                             | Vertebrates                                    | Hadari et al., 1995                                                                    |
| Galectin-9                          | T-lymphocytes, small intestine, liver, uterine epithelial cells, skin epidermis and oesophageal epithelium | Vertebrates                                    | Froehlich et al., 2012; Lensch et al., 2006; Matsumoto et al., 1998; Wada et al., 1997 |
| Galectin-10                         | Eosinophils                                                                                                | Primates, bats (galectin-4, N-CRD)             | Abedin et al., 2003                                                                    |
| Galectin-12                         | Adipose tissue                                                                                             | Vertebrates (galectin-8)                       | Hotta et al., 2001; Yang et al., 2004                                                  |
| Galectin-11 <sup>b</sup>            | Abomasal mucosa (ruminants), epithelial cells of bile ducts                                                | Ruminants (galectin-4, N-CRD)                  | Dunphy et al., 2000; Young et al., 2012                                                |
| Galectin-14 <sup>b</sup>            | Eosinophils                                                                                                | Ruminants (galectin-4, N-CRD)                  | Young et al., 2009                                                                     |
| Galectin-15 <sup>b</sup>            | Uterus                                                                                                     | Ruminants (galectin-4, N-CRD)                  | Gray et al., 2004                                                                      |
| Galectin-11 and others <sup>b</sup> | Placenta                                                                                                   | Primates (galectin-4, N-CRD)                   | Than et al., 2004; Than et al., 2009                                                   |
| GRP <sup>c</sup>                    | B-lymphocytes, bursa of Fabricius                                                                          | Vertebrates (galectin-8 or -12, C-CRD)         | Houzelstein et al., 2004; Manning et al., 2018                                         |
| GRIFIN <sup>d</sup>                 | Eye lens                                                                                                   | Vertebrates (galectin-2)                       | Caballero et al., 2018; Manning et al., 2018                                           |

<sup>a</sup>The main group within mammals is shown for galectins with limited species distribution. The closest related CRD among those conserved in most vertebrates is given.

<sup>b</sup>In the human placenta, a cluster of genes on chromosome 19 encode single-CRD galectins, all related to galectin-7, -10 and the N-terminal CRD of galectin-4 (also on chromosome 19); these include galectin-11, -13, -15 and potentially others. In ruminants, galectins with closely related sequences have been given overlapping names, despite their different tissue expression. Thus, it cannot easily be determined which are orthologues and which are paralogues.

<sup>c</sup>This galectin-related protein, termed HSPC159, was discovered as a clone from haematopoietic stem/progenitor cells (HSPCs). GRP does not have galactose binding activity and has a highly conserved sequence throughout vertebrates; it is best characterised in chicken.

<sup>d</sup>This protein was discovered in rat eye lens. It is found throughout vertebrates, with a highly variable sequence. The 7 amino acid galectin motif is disrupted in mammals, but almost complete in birds, and complete in fish and amphibians, suggesting it is a functional galectin in some species, as shown for chicken and zebrafish.

C-CRD, C-terminal carbohydrate recognition domain; N-CRD, N-terminal carbohydrate recognition domain.

### Box 1. Galectin inhibitors

The roles of galectins in cellular and pathophysiological processes has inspired the search for galectin inhibitors, both as potential drug leads, and as experimental tools in cell biology. A wide array of small-molecule inhibitors has been reviewed recently (Campo et al., 2016). Among these, the most potent inhibitors are based on disaccharide derivatives that fit into the core site (C-D), and with aromatic extensions that project into sites B and E, thereby reaching affinities in the low nM range. The synthetic disaccharide thiodigalactoside (Gal $\beta$ 1-S-1 $\beta$ Gal) projects a glycotope for site C-D (see Box S1 and poster), which is very similar to that used by natural disaccharides (Leffler and Barondes, 1986). Thus, derivatising both Gal residues with aromatic extensions allows favourable interactions ( $K_d$  around 2 nM) with galectin-3. The compound TD139 has shown *in vivo* efficacy in animal models of fibrosis and angiogenesis (Chen et al., 2017; Delaine et al., 2016) and is currently in clinical trials against idiopathic lung fibrosis, while another compound showed efficacy against insulin resistance in obese mice (Li et al., 2016). A large number of compounds are currently being developed to optimise the selectivity among galectins and their pharmacokinetic properties (Rajput et al., 2016). The compounds that are based on disaccharides are relatively water soluble and fail to be taken up well across membranes, making them not available orally in animals. Recently, a new class of galectin inhibitors that contain only one sugar residue was developed (Zetterberg et al., 2017), which, for the first time, constitute membrane-permeable and orally available potent ( $K_d$  in the low nM range) galectin inhibitors. Plant-derived polysaccharides, such as modified citrus pectin (MCP) or galactomannans, have also been proposed to act as pharmacological inhibitors of galectin-3 (Demotte et al., 2014; Glinsky and Raz, 2009; Inohara and Raz, 1994; Traber and Zomer, 2013) and some have reached clinical trial (Girard and Magnani, 2018). However, they appear to interact poorly or not at all with the canonical galectin carbohydrate-binding site (Stegmayr et al., 2016). In the pectin-derived saccharides, galactose residues occur mainly in Gal $\beta$ 1-4Gal configuration (Zhang et al., 2017), which fits only poorly in the canonical galectin disaccharide-binding site (C-D). In galactomannans, the main galactoses are found in 6-linkage to mannose (Miller et al., 2012), with only weak binding to galectins ( $K_d$  in the mM range) (Stegmayr et al., 2016). Interaction at other sites has been proposed (Miller et al., 2016, 2009; Zhang et al., 2017). Another issue is their possible effects on cellular components in addition to galectins (Fan et al., 2018).

affinity for larger glycoconjugates (Hirabayashi et al., 2002; Kamili et al., 2016; Leffler et al., 2004; Salomonsson et al., 2010a). Thus, while galectin CRDs typically bind galactose by themselves with affinities in the millimolar range, they bind the common disaccharide N-acetyl-lactosamine with a mid-micromolar affinity and may bind to their preferred glycoprotein with sub-micromolar affinity (see Boxes S1 and S2 for a more detailed discussion).

Of note, binding sites on the CRD for non-carbohydrate-containing ligands, such as those found in the cytosol and nucleus (described below), have also been identified. The best characterised example is the C-terminal CRD of galectin-8, where a binding site on the F-side (see poster) confers a specific affinity for the protein NDP52 (also known as CALCOCO2) (Kim et al., 2013; Li et al., 2013). A similar site in galectin-3 binds to its own N-terminal domain (Ippel et al., 2016). Sites at the edge of the CRDs confer the dimerisation of galectin-1, -2 and -7.

Even though galectins are largely monomeric in solution at physiological concentrations (Lepur et al., 2012; Salomonsson et al., 2010b), most are able to crosslink glycoconjugate ligands and cause their aggregation. For example, galectin-1 forms a weak dimer ( $K_d$  in low micromolar range) (Di Lella et al., 2011; Salomonsson et al., 2010b) and dimerisation may be enhanced upon ligand

encounter. Galectin-3 is monomeric up to high concentrations (100  $\mu$ M), but can aggregate with ligands and agglutinate cells at much lower concentrations, which is promoted by its N-terminal non-CRD region (Hsu et al., 1992; Massa et al., 1993) via an oligomerisation mechanism that is not yet completely understood (Ahmad et al., 2004; Barboni et al., 1999; Birdsall et al., 2001; Kuklinski and Probstmeier, 1998; Lepur et al., 2012; Nieminen et al., 2007; Yang et al., 1998) (see poster and Box S3). Galectins with two different CRDs may form non-covalent dimers to achieve an increase in valency (Kamili et al., 2016).

Multivalency is required for many of the biological effects of galectins, especially when they encounter the outside of cells, as it permits not only the crosslinking of ligands to induce signalling pathways and the formation of cell surface lattices, but also ligand endocytosis (see poster). Affinity enhancement by multivalency can be very strong for other lectin families and is termed the cluster glycoside effect (Lee and Lee, 2000; Lundquist and Toone, 2002). However, this effect appears to be modest or absent for galectins (Leppänen et al., 2005; Salomonsson et al., 2010b; Stowell et al., 2009).

It has been suggested that galectins may participate in liquid-liquid phase-separated structures (droplets) at the cell surface or in intracellular locations, based on weak interactions such as those found with terminal saccharide motifs (Banani et al., 2017; Dennis, 2015). Another interesting proposed role of weak binding is for rapid sampling of receptors (Kasai, 2006).

### Galectins in the cytosol and nucleus

Galectins interact with a panoply of cytosolic and nuclear ligands that do not appear to be functionally linked (Haudek et al., 2010) (see poster). Galectin-1 and galectin-3 interact with the small GTPases HRAS (Paz et al., 2001) and KRAS (Shalom-Feuerstein et al., 2008), respectively. In one proposed mechanism, galectin-1 binds to and stabilises RAS dimers to positively regulate GTP-HRAS nanoscale signalling hubs (Blaževič et al., 2016).

Galectin-3 associates with basal bodies and centrosomes, and its absence results in disorganisation of microtubules and perturbation of epithelial morphogenesis of primary cilia (Koch et al., 2010) or motile respiratory epithelial cilia (Clare et al., 2014). Moreover, galectin-3 associates with nuclear mitotic apparatus protein (NuMa), a key mitotic regulator required for the establishment and cohesion of the spindle pole (Magescas et al., 2017). Expression of mutant NuMA blocked in O-GlcNAc glycosylation results in aberrant spindle pole formation. This mutant does not co-immunoprecipitate galectin-3, which suggests that the galectin-3–NuMA interaction depends on O-GlcNAc glycosylation (Magescas et al., 2017). The exact mechanism remains unclear as O-GlcNAc itself does not bind galectin-3.

Galectin-3 also interacts with the endosomal sorting complex required for transport (ESCRT). Yeast two-hybrid analysis revealed interaction of the N-terminal domain of galectin-3 with the ESCRT component ALG-2-interacting protein X (AliX) (Chen et al., 2009), which promotes T-cell receptor downregulation, affects intracellular trafficking of the epidermal growth factor receptor (Liu et al., 2012) and release of human immunodeficiency virus (HIV)-1 (Wang et al., 2014). ESCRT components have fundamental roles in the biogenesis of multivesicular bodies (MVBs), which may provide opportunities to recruit galectin-3 into exosomes that are released from MVBs. Their presence in exosomes has been shown for galectin-3 (Fei et al., 2015; They et al., 2001; Welton et al., 2010) and galectin-9 (Keryer-Bibens et al., 2006).

Other examples of cytosolic functions for galectins include the association of galectin-3 with  $\beta$ -catenin and the Wnt signalling

pathway (Shimura et al., 2005) and with Bcl2 for the regulation of apoptosis (Harazono et al., 2014b). Here, the NWGR motif in galectin-3 has been recognised to be anti-apoptotic and implicated in its association with both Bcl2 and Ras (Harazono et al., 2014a). However, it is important to note that this sequence is also part of the canonical galactose-binding site (Salomonsson et al., 2010a).

Galectin-3 shuttles between the cytoplasm and the nucleus. Nuclear localisation sequences were identified in murine galectin-3 [(253)ITLT(256); Davidson et al., 2006] and human galectin-3 [(223)HRVKKL(228); Nakahara et al., 2006], and the latter was shown to bind to importin- $\alpha$  for passage through nuclear pores. In addition, a leucine-rich nuclear export signal (NES) is found at positions 241-249 of murine galectin-3 (Tsay et al., 1999). All these sequences are within the CRD. Yet, the N-terminus of galectin-3 may also contribute to active nuclear transport. Indeed, phosphorylation of galectin-3 at Ser6 by casein kinase 1 (Huflejt et al., 1993) plays a role in its nuclear export and its anti-apoptotic activity (Haudek et al., 2010).

In the nucleus, galectin-1 and galectin-3 are involved in nuclear splicing of pre-mRNAs and in gene expression (Dagher et al., 1995; Vyakarnam et al., 1997). Both galectins have been shown to be functionally redundant splicing factors for mRNA processing and nuclear export (Wang et al., 2006). Galectin-3 assembles with small nuclear ribonucleoprotein (snRNP) particles in nuclear extracts. Here, it was identified in the earliest detectable mammalian prespliceosome complex (E-complex) (Haudek et al., 2016), and the heterogeneous nuclear ribonucleoprotein complex (H-complex) (Fritsch et al., 2016). These complexes initiate spliceosome assembly and the splicing cascade (Michaud and Reed, 1991). In the cytosol of pancreatic cancer cells, galectin-3 also stabilises *MUC4* mRNA by interacting with the heterogeneous nuclear ribonucleoprotein L (Coppin et al., 2017). Galectin-3 has furthermore been implicated in the regulation of transcription through various mechanisms (see Kang et al., 2016 and references therein).

### Galectins at disrupted vesicles with roles in autophagy and non-classical secretion

Galectins rapidly accumulate around disrupted endocytic vesicles or compartments. This appears to be due to the binding of cytosolic galectin to glycans, which are normally present in the lumen and, upon disruption, are exposed to the cytosol. This phenomenon was first discovered for galectin-3 on *Shigella*-containing vacuoles that undergo lysis (Paz et al., 2010) (see poster). Subsequently, it was also observed for galectin-8 on *Salmonella*-containing vacuoles (Thurston et al., 2012), galectin-3 on adenovirus-containing endosomes (Maier et al., 2012), and for galectin-1 and galectin-9 (Thurston et al., 2012). Galectins also accumulate around endosomes that have been disrupted in other ways, for instance by protein aggregates in neurodegenerative disease (Flavin et al., 2017; Jiang et al., 2017), by chemicals (Aits et al., 2015) or by nucleic acid transfection reagents (Wittrup et al., 2015). One function of this phenomenon is to link vesicle disruption to selective autophagy; here, the N-terminal CRD of galectin-8 interacts with glycoconjugates, whereas the C-terminal CRD interacts with the pathogen-specific autophagy receptor NDP52 (Boyle and Randow, 2013; Kwon and Song, 2018). Galectin-3 accumulation has been proposed to inhibit the galectin-8-mediated link to autophagy (Cheng et al., 2017). Galectins also interact with the tripartite motif-containing (TRIM) proteins, which are another class of receptors for selective autophagy (Chauhan et al., 2016).

The accumulation of galectins around disrupted vesicles is very rapid (within minutes) and easy to detect with immunohistochemistry

or when using GFP-conjugated galectins (Paz et al., 2010). Hence, galectins have become a useful tool for detecting vesicle disruption in cell culture and *in vivo* (Aits et al., 2015), which can be exploited to assess the intracellular activity of galectin inhibitors (Stegmayr et al., 2016) (see also Box 1).

The non-classical secretion of galectins was shown to require their galactoside-binding activity (Seelenmeyer et al., 2005); this has led to the suggestion that accumulation around disrupted vesicles and binding to luminal glycans might provide a mechanistic link between autophagy and galectin secretion (Hughes, 1999). However, in another study, maturation of N-linked glycoprotein was not required for galectin-3 transport from the cytosol to the extracellular space, and secreted galectin-3 was predominantly free and not packaged into extracellular vesicles (Stewart et al., 2017), indicating that further studies are required to settle this matter. For galectin-4 secretion, a link to Src-mediated tyrosine-phosphorylation has been proposed (Ideo et al., 2013). Thus, the mechanism for the non-classical secretion of galectins remains unclear.

### Galectins in extracellular and intravesicular compartments

Upon their non-classical secretion, galectins enter the extracellular space, where they encounter ligands such as galactose-containing glycoproteins and glycolipids (see poster). Galectins can re-enter cells by endocytosis (Furtak et al., 2001) and populate endocytic and recycling compartments (Stechly et al., 2009; Straube et al., 2013).

According to the glycolipid-lectin (GL-Lect) hypothesis, binding of galectin to glycosylated cargo proteins, such as CD44 and  $\alpha 5\beta 1$  integrin, triggers galectin oligomerisation, which then enables their interaction with glycosphingolipids (Box S2) and the generation of membrane curvature, leading to the formation of tubular endocytic pits from which clathrin-independent endocytic carriers are formed (Johannes et al., 2016; Lakshminarayan et al., 2014) (see poster).

Galectins have also been described to counteract endocytic uptake by forming lattices at the plasma membrane (Brewer et al., 2002; Demetriou et al., 2001; Dennis, 2015; Dennis and Brewer, 2013; Dennis et al., 2009; Di Lella et al., 2011; Gupta et al., 1996; Kamili et al., 2016; Sacchetti et al., 2001; reviewed in Nabi et al., 2015). The balance between stimulation of endocytosis or the formation of an inhibitory lattice may depend on the specificity, structure and concentration of both the galectins themselves, and their glycoprotein and glycolipid ligands. A highly interesting link to the metabolic state of cells has been proposed, which is mediated by the intracellular levels of GlcNAc and UDP-GlcNAc that affect quantity and branching of complex N-glycans and so regulate galectin binding and the galectin lattice (Lau et al., 2007).

The T168N mutation in the interferon- $\gamma$  receptor (IFN- $\gamma$ R), which causes Mendelian susceptibility to mycobacterial diseases syndrome (MSMD) (Kong et al., 2010), illustrates how abnormal interactions with galectins affect receptor function. This mutation creates a new N-glycosylation site, in addition to the six that are normally present; this draws the receptor from lipid nanodomains into actin nanodomains, thereby reducing its signalling function (Blouin et al., 2016). This also demonstrates that a dysregulation of the galectin system may predispose to disease. A similar interplay between actin and galectins has also been described for the T-cell receptor (Chen et al., 2007).

Galectins regulate the trafficking of intravesicular glycoprotein cargoes. Galectin-3 and galectin-4 accumulate in endosomal organelles following their internalisation from the cell surface

(Stechly et al., 2009; Straube et al., 2013). Alternatively, a direct route from the cytosol into the lumen of endosomes could be possible, but this has not yet been shown. These endosomes serve as platforms for the sorting of cargo molecules into transport vesicles destined for the apical membrane of epithelial cells. Galectin-4 specifically interacts with lipid raft-associated glycoproteins, whereas galectin-3 binds to the non-raft fraction (Delacour et al., 2006, 2005). Depletion of the two galectins results in basolateral mis-sorting of the corresponding glycoproteins, suggesting an involvement of galectins in apical protein sorting (Delacour et al., 2006, 2005). Galectin-3-mediated apical sorting comprises pH-dependent cargo binding (von Mach et al., 2014) and cargo crosslinking into high-molecular weight clusters in a post-Golgi compartment (Delacour et al., 2007). Galectin-4-dependent sorting depends on the exposure of complex N-glycans on apical glycoproteins (Morelle et al., 2009). Both galectins escort their ligands to the apical cell surface, where they enter the apical milieu and are then reinternalised into endosomal organelles for a new round of apical protein sorting (Stechly et al., 2009; Straube et al., 2013) (see poster). Such a pathway is further supported by evidence for retrograde trafficking of galectin-9 from the plasma membrane to the Golgi (Mishra et al., 2010), which suggests participation of this galectin (and possibly others) in sorting events at the trans-Golgi network (TGN).

Extracellular galectins also induce signals from the cell surface and modify interactions with and within the extracellular matrix, as well as with microbes (Arthur et al., 2015; Di Lella et al., 2011; Gordon-Alonso et al., 2017; Thiemann and Baum, 2016). Most studies described here have considered only the common galactoside binding ability of galectins, but not the finer details in their specificity (described in Box S1). The role of N-glycan branching and extension with poly-N-acetyl lactosamines in lattice formation has been analysed and modelled in detail (Kamili et al., 2016; Nabi et al., 2015). The role of higher N-glycan branching for galectin-3 binding and intracellular routing of transferrin has also been demonstrated (Carlsson et al., 2013). Sialylation at the 3-position of galactose, which gives high affinity binding to galectin-8, directs the intracellular trafficking of this galectin (Carlsson et al., 2007). The inhibition of galectin-1 binding by sialylation at the 6-position of galactose has been suggested to make Th1 cells resistant to apoptosis (Di Lella et al., 2011).

#### **Links between the extracellular and cytosolic functions of galectins**

The cytosolic and nuclear localisation and functions of galectins (Haudek et al., 2010) have been known almost as long as the extracellular ones (Di Lella et al., 2011), and this raises the question of whether the intra- and extracellular functions of galectins are connected by a regulatory system. Early evidence for this came from the observation that galectin-1 switches from a predominantly intracellular localisation in cultured myoblasts to a predominantly extracellular localisation upon their differentiation into myotubes (Cooper and Barondes, 1990). In developing mammary gland epithelial cells, galectin-1 was found mainly in the cytosol and nucleus of cells of the end bud, whereas it localised to the cell surface or extracellularly in duct cells (Bhat et al., 2016). Furthermore, galectin-1 binding to glycoconjugates was increased in the duct cells, with evidence that this interaction could 'draw' the galectin to an extracellular location (Bhat et al., 2016). Such a mechanism could provide a regulatory loop, whereby extracellular galectin-1-binding glycoconjugates reduce galectin concentration and associated functions in the cytosol and/or nucleus.

#### **Considerations at the organismal level**

A highly interesting and plausible picture of the physiological and pathophysiological galectin functions in inflammation, immunity, cancer and many other diseases (Sciacchitano et al., 2018) has emerged from biochemical and cellular studies as described above, as well as from evidence from whole organisms (Table 1), in which galectins or their ligands were manipulated using genetic techniques, galectin inhibitors or galectins themselves (Table S1). As a detailed discussion is beyond the scope of this review, we pose here three fundamental questions.

#### **What is the role of galectins in serum?**

The concentration of galectins in serum or plasma is typically in the high picomolar range, whereas most cellular studies have been performed at much higher concentrations. Thus, it is not likely that galectins act at a distance, similar to circulating hormones. Instead, their presence in serum may result from leakage from tissue, as has been found for many other proteins (Landegren et al., 2018) and serum levels of galectins could therefore be useful as diagnostic markers for disease. A correlation between galectin-3 levels and heart disease has indeed recently emerged (Gehlken et al., 2018). Furthermore, galectin-driven homotypic aggregation and/or adhesion of cancer cells to endothelial cells has been proposed to lead to increased metastasis (Glinisky et al., 2001; Sindrewicz et al., 2016). It has also been shown that at concentrations as low as 0.3 nM, galectin-3 stimulates sugar-dependent CD44 endocytosis (Lakshminarayan et al., 2014), whereas galectin-7 affects the endocytosis of E-cadherin in a sugar-independent manner (Advedissian et al., 2017). These findings suggest that some galectin-mediated cellular activities might indeed be sufficiently sensitive to respond to serum levels of galectins.

#### **Can galectins from one cell act on other cells?**

Adoptive transfer of bone marrow between galectin knockout and wild-type mice clearly showed that galectin-1 from cancer cells has angiogenic and immunosuppressive effects on the surrounding cells (Méndez-Huergo et al., 2017). Galectin-3 from myeloid cells also affects the growth of cancer cells and induces insulin resistance in fat cells (Li et al., 2016). Hence, galectins can have both autocrine and paracrine functions.

#### **Do galectins have intra- and extracellular functions at the organismal level?**

Most of the descriptions of galectin function in whole organisms consider the carbohydrate-binding activity of galectins, and have been suggested to take place either within the extracellular space, at the cell surface and/or in intracellular trafficking pathways (Blidner et al., 2015; Thiemann and Baum, 2016). However, as discussed above, galectins are rapidly endocytosed and directly traffic along both endocytic and exocytic pathways (Furtak et al., 2001; Lakshminarayan et al., 2014; Schneider et al., 2010; Straube et al., 2013). Thus, the cellular expression and release of galectins can modify these trafficking properties, possibly by setting an optimum level of galectin in the combined intra- and extracellular compartments of an organism. This may result in direct galectin-induced signalling (e.g. induction of apoptosis in T-cells) or galectin-regulated cell surface exposure and lateral organisation of glycosylated receptors, such as T-cell, VEGF, TGF $\beta$  and insulin receptors, along with their subsequent effects, including induction of angiogenesis, lymphangiogenesis, fibrosis in chronic inflammation and other mainly immune-regulatory functions (Blidner et al., 2015; Thiemann and Baum, 2016) (Table S1).

By contrast, the contribution of the cytosolic and nuclear activities of galectins to their organismal functions have been considered to a much lesser extent. The accumulation of galectins around damaged vesicles has been shown to occur also on cells within the organismal context (Aits et al., 2015), and thus may be a useful marker for vesicle-disrupting activities *in vivo*, as observed in neurodegenerative disease (Flavin et al., 2017; Jiang et al., 2017). Another elegant example is the role of galectin-3 in organising airway cilia and other cilia within the living organism (Clare et al., 2014), demonstrating an organismal role for the association of galectin-3 with centrosomes. These roles of galectins may also be connected to their extracellular activities, as described above, and have stimulated the development of galectin inhibitors as therapeutics (Box 1). Such drugs have been used to inhibit the immunosuppressive and angiogenesis-inducing effects of galectin-1, galectin-3 and galectin-9 in cancer (Blidner et al., 2015), to prevent unwanted angiogenesis in the eye (Chen et al., 2017) and to reduce fibrosis in chronic inflammation (Delaine et al., 2016). Anti-inflammatory galectin inhibitors have already reached the clinical development stage (<https://galecto.com/>).

### Conclusions and perspectives

Although the galectin field has come a long way in the past decade, a number of aspects remain incompletely understood, such as the molecular mechanisms of their actions in intra- and extracellular space and the relationship between these activities, as well as any associated regulatory loops. Furthermore, the structural aspects of galectin function, notably those linked to their oligomerisation, are also not fully known and require further work. Another exciting challenge in the field of cellular glycobiology is to elucidate the quantitative aspects of galectin distribution in cells and tissues, and the redundancies and specificities of galectins in health and disease. Addressing these issues will help to demystify the many cellular and organismal functions of galectins and pave the way to future therapeutic strategies for associated diseases and conditions.

### Competing interests

H.L. is co-founder and shareholder in Galecto Biotech AB.

### Funding

Work in the Johannes team in the context of the current review is supported by grants from the Agence Nationale pour la Recherche (ANR-14-CE16-0004-03, ANR-14-CE14-0002-02, ANR-16-CE23-0005-02, ANR-16-CE23-0005-02), Human Frontier Science Program (RGP0029-2014), European Research Council advanced grant (project 340485), European Union program H2020-MSCA-ITN-2014 BIOPOL, and the Swedish Research Council. The Johannes team is a member of Labex CelTisPhyBio (11-LBX-0038) and Idex Paris Sciences et Lettres (ANR-10-IDEX-0001-02 PSL). The Jacob team was supported by the Deutsche Forschungsgemeinschaft (grant JA 1033/7 and graduate school 2213). Hakon Leffler is supported by Swedish Research Council, a project grant awarded by the Knut and Alice Wallenberg Foundation (KAW 2013.0022) and Galecto Biotech AB, Sweden.

### Cell science at a glance

A high-resolution version of the poster and individual poster panels are available for downloading at <http://jcs.biologists.org/lookup/doi/10.1242/jcs.208884.supplemental>

### Supplementary information

Supplementary information available online at <http://jcs.biologists.org/lookup/doi/10.1242/jcs.208884.supplemental>

### References

**Abedin, M. J., Kashio, Y., Seki, M., Nakamura, K. and Hirashima, M.** (2003). Potential roles of galectins in myeloid differentiation into three different lineages. *J. Leukoc. Biol.* **73**, 650-656.

**Advedissian, T., Proux-Gillardeaux, V., Nkosi, R., Peyret, G., Nguyen, T., Poirier, F., Viguier, M. and Deshayes, F.** (2017). E-cadherin dynamics is regulated by galectin-7 at epithelial cell surface. *Sci. Rep.* **7**, 17086.

**Ahmad, N., Gabius, H.-J., André, S., Kaltner, H., Sabesan, S., Roy, R., Liu, B., Macaluso, F. and Brewer, C. F.** (2004). Galectin-3 precipitates as a pentamer with synthetic multivalent carbohydrates and forms heterogeneous cross-linked complexes. *J. Biol. Chem.* **279**, 10841-10847.

**Aits, S., Kricker, J., Liu, B., Ellegaard, A.-M., Hämälistö, S., Tvingsholm, S., Corcelle-Termeau, E., Høgh, S., Farkas, T., Holm Jonassen, A. et al.** (2015). Sensitive detection of lysosomal membrane permeabilization by lysosomal galectin puncta assay. *Autophagy* **11**, 1408-1424.

**Arthur, C. M., Baruffi, M. D., Cummings, R. D. and Stowell, S. R.** (2015). Evolving mechanistic insights into galectin functions. *Methods Mol. Biol.* **1207**, 1-35.

**Banani, S. F., Lee, H. O., Hyman, A. A. and Rosen, M. K.** (2017). Biomolecular condensates: organizers of cellular biochemistry. *Nat. Rev. Mol. Cell. Biol.* **18**, 285-298.

**Barboni, E. A. M., Bawumia, S. and Hughes, R. C.** (1999). Kinetic measurements of binding of galectin 3 to a laminin substratum. *Glycoconj. J.* **16**, 365-373.

**Barondes, S. H., Castronovo, V., Cooper, D. N. W., Cummings, R. D., Drickamer, K., Felzi, T., Gitt, M. A., Hirabayashi, J., Hughes, C., Kasai, K. et al.** (1994). Galectins: a family of animal beta-galactoside-binding lectins. *Cell* **76**, 597-598.

**Bhat, R., Belardi, B., Mori, H., Kuo, P., Tam, A., Hines, W. C., Le, Q.-T., Bertozzi, C. R. and Bissell, M. J.** (2016). Nuclear repartitioning of galectin-1 by an extracellular glycan switch regulates mammary morphogenesis. *Proc. Natl. Acad. Sci. USA* **113**, E4820-E4827.

**Birdsall, B., Feeney, J., Burdett, I. D. J., Bawumia, S., Barboni, E. A. M. and Hughes, R. C.** (2001). NMR solution studies of hamster galectin-3 and electron microscopic visualization of surface-adsorbed complexes: evidence for interactions between the N- and C-terminal domains. *Biochemistry* **40**, 4859-4866.

**Blaževič, O., Mideksa, Y. G., Šolman, M., Ligabue, A., Ariotti, N., Nakhaeizadeh, H., Fansa, E. K., Papageorgiou, A. C., Wittinghofer, A., Ahmadian, M. R. et al.** (2016). Galectin-1 dimers can scaffold Raf-effectors to increase H-ras nanoclustering. *Sci. Rep.* **6**, 24165.

**Blidner, A. G., Méndez-Huergo, S. P., Cagnoni, A. J. and Rabinovich, G. A.** (2015). Re-wiring regulatory cell networks in immunity by galectin-glycan interactions. *FEBS Lett.* **589**, 3407-3418.

**Blouin, C. M., Hamon, Y., Gonnord, P., Boularan, C., Kagan, J., Viaris de Lesegno, C., Ruez, R., Mailfert, S., Bertaux, N., Loew, D. et al.** (2016). Glycosylation-dependent IFN-gammaR partitioning in lipid and actin nanodomains is critical for JAK activation. *Cell* **166**, 920-934.

**Boyle, K. B. and Randow, F.** (2013). The role of 'eat-me' signals and autophagy cargo receptors in innate immunity. *Curr. Opin. Microbiol.* **16**, 339-348.

**Brewer, C. F., Miceli, M. C. and Baum, L. G.** (2002). Clusters, bundles, arrays and lattices: novel mechanisms for lectin-saccharide-mediated cellular interactions. *Curr. Opin. Struct. Biol.* **12**, 616-623.

**Caballero, G. G., Manning, J. C., Ludwig, A.-K., Ruiz, F. M., Romero, A., Kaltner, H. and Gabius, H.-J.** (2018). Members of the galectin network with deviations from the canonical sequence signature. 1. Galectin-related inter-fiber protein (GRIFIN). *Trends Glycosci. Glycotechnol.* **30**, SE1-SE9.

**Campo, V. L., Marchiori, M. F., Rodrigues, L. C. and Dias-Baruffi, M.** (2016). Synthetic glycoconjugates inhibitors of tumor-related galectin-3: an update. *Glycoconj. J.* **33**, 853-876.

**Carlsson, S., Carlsson, M. C. and Leffler, H.** (2007). Intracellular sorting of galectin-8 based on carbohydrate fine specificity. *Glycobiology* **17**, 906-912.

**Carlsson, M. C., Bengtson, P., Cucak, H. and Leffler, H.** (2013). Galectin-3 guides intracellular trafficking of some human serotransferrin glycoforms. *J. Biol. Chem.* **288**, 28398-28408.

**Cerra, R. F., Gitt, M. A. and Barondes, S. H.** (1985). Three soluble rat beta-galactoside-binding lectins. *J. Biol. Chem.* **260**, 10474-10477.

**Chauhan, S., Kumar, S., Jain, A., Ponpuak, M., Mudd, M. H., Kimura, T., Choi, S. W., Peters, R., Mandell, M., Bruun, J.-A. et al.** (2016). TRIMs and galectins globally cooperate and TRIM16 and Galectin-3 co-direct autophagy in endomembrane damage homeostasis. *Dev. Cell* **39**, 13-27.

**Chen, I.-J., Chen, H.-L. and Demetriou, M.** (2007). Lateral compartmentalization of T cell receptor versus CD45 by galectin-N-glycan binding and microfilaments coordinate basal and activation signaling. *J. Biol. Chem.* **282**, 35361-35372.

**Chen, H.-Y., Fermin, A., Vardhana, S., Weng, I.-C., Lo, K. F. R., Chang, E.-Y., Mavroukakis, E., Yang, R.-Y., Hsu, D. K., Dustin, M. L. et al.** (2009). Galectin-3 negatively regulates TCR-mediated CD4+ T-cell activation at the immunological synapse. *Proc. Natl. Acad. Sci. USA* **106**, 14496-14501.

**Chen, W.-S., Cao, Z., Leffler, H., Nilsson, U. J. and Panjwani, N.** (2017). Galectin-3 Inhibition by a Small-Molecule Inhibitor Reduces Both Pathological Corneal Neovascularization and Fibrosis. *Invest. Ophthalmol. Vis. Sci.* **58**, 9-20.

**Cheng, Y. L., Wu, Y. W., Kuo, C. F., Lu, S. L., Liu, F. T., Anderson, R., Lin, C. F., Liu, Y. L., Wang, W. Y., Chen, Y. D. et al.** (2017). Galectin-3 inhibits Galectin-8/Parkin-mediated ubiquitination of group A streptococcus. *MBio* **8**, e00899-17.

**Clare, D. K., Magescas, J., Piolot, T., Dumoux, M., Vesque, C., Pichard, E., Dang, T., Duvauchelle, B., Poirier, F. and Delacour, D.** (2014). Basal foot MTOC organizes pillar MTs required for coordination of beating cilia. *Nat. Commun.* **5**, 4888.

**Cooper, D. N.** (2002). Galectinomics: finding themes in complexity. *Biochim. Biophys. Acta* **1572**, 209-231.

- Cooper, D. N. and Barondes, S. H. (1990). Evidence for export of a muscle lectin from cytosol to extracellular matrix and for a novel secretory mechanism. *J. Cell Biol.* **110**, 1681-1691.
- Coppin, L., Vincent, A., Frénois, F., Duchêne, B., Lahdaoui, F., Stechly, L., Renaud, F., Villenet, C., Seuning, I. V., Leteurre, E. et al. (2017). Galectin-3 is a non-classic RNA binding protein that stabilizes the mucin MUC4 mRNA in the cytoplasm of cancer cells. *Sci. Rep.* **7**, 43927.
- Cummings, R. D., Liu, F. T. and Vasta, G. R. (2015). Galectins. In *Essentials of Glycobiology* (ed. A. Varki, R. D. Cummings, J. D. Esko, P. Stanley, G. W. Hart, M. Aebi, A. G. Darvill, T. Kinoshita, N. H. Packer et al.), pp. 469-480. Cold Spring Harbor, NY: Cold Spring Harbor Laboratory Press.
- Dagher, S. F., Wang, J. L. and Patterson, R. J. (1995). Identification of galectin-3 as a factor in pre-mRNA splicing. *Proc. Natl. Acad. Sci. USA* **92**, 1213-1217.
- Davidson, P. J., Li, S.-Y., Lohse, A. G., Vandergaast, R., Verde, E., Pearson, A., Patterson, R. J., Wang, J. L. and Arnoys, E. J. (2006). Transport of galectin-3 between the nucleus and cytoplasm. I. Conditions and signals for nuclear import. *Glycobiology* **16**, 602-611.
- Delacour, D., Gouyer, V., Zanetta, J.-P., Drobecq, H., Leteurre, E., Grard, G., Moreau-Hannedouche, O., Maes, E., Pons, A., André, S. et al. (2005). Galectin-4 and sulfatides in apical membrane trafficking in enterocyte-like cells. *J. Cell Biol.* **169**, 491-501.
- Delacour, D., Cramm-Behrens, C. I., Drobecq, H., Le Bivic, A., Naim, H. Y. and Jacob, R. (2006). Requirement for galectin-3 in apical protein sorting. *Curr. Biol.* **16**, 408-414.
- Delacour, D., Greb, C., Koch, A., Salomonsson, E., Leffler, H., Le Bivic, A. and Jacob, R. (2007). Apical sorting by galectin-3-dependent glycoprotein clustering. *Traffic* **8**, 379-388.
- Delaine, T., Collins, P., MacKinnon, A., Sharma, G., Stegmayr, J., Rajput, V. K., Mandal, S., Cumpste, I., Larumbe, A., Salameh, B. A. et al. (2016). Galectin-3-binding glycomimetics that strongly reduce bleomycin-induced lung fibrosis and modulate intracellular glycan recognition. *ChemBiochemistry* **17**, 1759-1770.
- Demetriou, M., Granovsky, M., Quaggin, S. and Dennis, J. W. (2001). Negative regulation of T-cell activation and autoimmunity by Mgat5 N-glycosylation. *Nature* **409**, 733-739.
- Demotte, N., Bigirimana, R., Wieers, G., Stroobant, V., Squifflet, J.-L., Carrasco, J., Thielemans, K., Baurain, J.-F., Van Der Smissen, P., Courtroy, P. J. et al. (2014). A short treatment with galactomannan GM-CT-01 corrects the functions of freshly isolated human tumor-infiltrating lymphocytes. *Clin. Cancer Res.* **20**, 1823-1833.
- Dennis, J. W. (2015). Many light touches convey the message. *Trends Biochem. Sci.* **40**, 673-686.
- Dennis, J. W. and Brewer, C. F. (2013). Density-dependent lectin-glycan interactions as a paradigm for conditional regulation by posttranslational modifications. *Mol. Cell. Proteomics* **12**, 913-920.
- Dennis, J. W., Lau, K. S., Demetriou, M. and Nabi, I. R. (2009). Adaptive regulation at the cell surface by N-glycosylation. *Traffic* **10**, 1569-1578.
- Di Lella, S., Sundblad, V., Cerliani, J. P., Guardia, C. M., Estrin, D. A., Vasta, G. R. and Rabinovich, G. A. (2011). When galectins recognize glycans: from biochemistry to physiology and back again. *Biochemistry* **50**, 7842-7857.
- Dunphy, J. L., Balic, A., Barcham, G. J., Horvath, A. J., Nash, A. D. and Meeusen, E. N. T. (2000). Isolation and characterization of a novel inducible mammalian galectin. *J. Biol. Chem.* **275**, 32106-32113.
- Fan, Y., Sun, L., Yang, S., He, C., Tai, G. and Zhou, Y. (2018). The roles and mechanisms of homogalacturonan and rhamnogalacturonan I pectins on the inhibition of cell migration. *Int. J. Biol. Macromol.* **106**, 207-217.
- Fei, F., Joo, E. J., Tarighat, S. S., Schiffer, I., Paz, H., Fabbri, M., Abdel-Azim, H., Groffen, J. and Heisterkamp, N. (2015). B-cell precursor acute lymphoblastic leukemia and stromal cells communicate through Galectin-3. *Oncotarget* **6**, 11378-11394.
- Flavin, W. P., Bousset, L., Green, Z. C., Chu, Y., Skarpathiotis, S., Chaney, M. J., Kordower, J. H., Melki, R. and Campbell, E. M. (2017). Endocytic vesicle rupture is a conserved mechanism of cellular invasion by amyloid proteins. *Acta Neuropathol.* **134**, 629-653.
- Fritsch, K., Mernberger, M., Nist, A., Stiewe, T., Brehm, A. and Jacob, R. (2016). Galectin-3 interacts with components of the nuclear ribonucleoprotein complex. *BMC Cancer* **16**, 502.
- Froehlich, R., Hambruch, N., Haeger, J.-D., Dilly, M., Kaltner, H., Gabius, H.-J. and Pfarrer, C. (2012). Galectin fingerprinting detects differences in expression profiles between bovine endometrium and placentomes as well as early and late gestational stages. *Placenta* **33**, 195-201.
- Furtak, V., Hatcher, F. and Ochieng, J. (2001). Galectin-3 mediates the endocytosis of beta-1 integrins by breast carcinoma cells. *Biochem. Biophys. Res. Commun.* **289**, 845-850.
- Gehlken, C., Suthahar, N., Meijers, W. C. and de Boer, R. A. (2018). Galectin-3 in heart failure: an update of the last 3 years. *Heart Fail. Clin.* **14**, 75-92.
- Girard, A. and Magnani, J. L. (2018). Clinical trials and applications of galectin antagonists. *Trends Glycosci. Glycotechnol.* **30** (in press).
- Gitt, M. A., Wiser, M. F., Leffler, H., Herrmann, J., Xia, Y.-R., Massa, S. M., Cooper, D. N. W., Lusic, A. J. and Barondes, S. H. (1995). Sequence and mapping of galectin-5, a beta-galactoside-binding lectin, found in rat erythrocytes. *J. Biol. Chem.* **270**, 5032-5038.
- Gitt, M. A., Xia, Y.-R., Atchison, R. E., Lusic, A. J., Barondes, S. H. and Leffler, H. (1998). Sequence, structure, and chromosomal mapping of the mouse Lgals6 gene, encoding galectin-6. *J. Biol. Chem.* **273**, 2961-2970.
- Glinsky, V. V. and Raz, A. (2009). Modified citrus pectin anti-metastatic properties: one bullet, multiple targets. *Carbohydr. Res.* **344**, 1788-1791.
- Glinsky, V. V., Glinsky, G. V., Rittenhouse-Olson, K., Hufejt, M. E., Glinskii, O. V., Deutscher, S. L. and Quinn, T. P. (2001). The role of Thomsen-Friedenreich antigen in adhesion of human breast and prostate cancer cells to the endothelium. *Cancer Res.* **61**, 4851-4857.
- Gordon-Alonso, M., Hirsch, T., Wildmann, C. and van der Bruggen, P. (2017). Galectin-3 captures interferon-gamma in the tumor matrix reducing chemokine gradient production and T-cell tumor infiltration. *Nat. Commun.* **8**, 793.
- Gray, C. A., Adelson, D. L., Bazer, F. W., Burghardt, R. C., Meeusen, E. N. T. and Spencer, T. E. (2004). Discovery and characterization of an epithelial-specific galectin in the endometrium that forms crystals in the trophectoderm. *Proc. Natl. Acad. Sci. USA* **101**, 7982-7987.
- Gupta, D., Kaltner, H., Dong, X., Gabius, H.-J. and Brewer, C. F. (1996). Comparative cross-linking activities of lactose-specific plant and animal lectins and a natural lactose-binding immunoglobulin G fraction from human serum with asialofetuin. *Glycobiology* **6**, 843-849.
- Hadari, Y. R., Paz, K., Dekel, R., Mestrovic, T., Accili, D. and Zick, Y. (1995). Galectin-8. A new rat lectin, related to galectin-4. *J. Biol. Chem.* **270**, 3447-3453.
- Harazono, Y., Kho, D. H., Balan, V., Nakajima, K., Zhang, T., Hogan, V. and Raz, A. (2014a). Galectin-3 leads to attenuation of apoptosis through Bax heterodimerization in human thyroid carcinoma cells. *Oncotarget* **5**, 9992-10001.
- Harazono, Y., Nakajima, K. and Raz, A. (2014b). Why anti-Bcl-2 clinical trials fail: a solution. *Cancer Metastasis Rev.* **33**, 285-294.
- Haudek, K. C., Spronk, K. J., Voss, P. G., Patterson, R. J., Wang, J. L. and Arnoys, E. J. (2010). Dynamics of galectin-3 in the nucleus and cytoplasm. *Biochim. Biophys. Acta* **1800**, 181-189.
- Haudek, K. C., Voss, P. G., Wang, J. L. and Patterson, R. J. (2016). A 10S galectin-3-U1 snRNP complex assembles into active spliceosomes. *Nucleic Acids Res.* **44**, 6391-6397.
- Hirabayashi, J. and Kasai, K.-I. (1993). The family of metazoan metal-independent beta-galactoside-binding lectins: structure, function and molecular evolution. *Glycobiology* **3**, 297-304.
- Hirabayashi, J., Hashidate, T., Arata, Y., Nishi, N., Nakamura, T., Hirashima, M., Urashima, T., Oka, T., Futai, M., Muller, W. E. et al. (2002). Oligosaccharide specificity of galectins: a search by frontal affinity chromatography. *Biochim. Biophys. Acta* **1572**, 232-254.
- Hotta, K., Funahashi, T., Matsukawa, Y., Takahashi, M., Nishizawa, H., Kishida, K., Matsuda, M., Kuriyama, H., Kihara, S., Nakamura, T. et al. (2001). Galectin-12, an adipose-expressed galectin-like molecule possessing apoptosis-inducing activity. *J. Biol. Chem.* **276**, 34089-34097.
- Houzelstein, D., Goncalves, I. R., Fadden, A. J., Sidhu, S. S., Cooper, D. N. W., Drickamer, K., Leffler, H. and Poirier, F. (2004). Phylogenetic analysis of the vertebrate galectin family. *Mol. Biol. Evol.* **21**, 1177-1187.
- Houzelstein, D., Goncalves, I. R., Orth, A., Bonhomme, F. and Netter, P. (2008). Lgals6, a 2-million-year-old gene in mice: a case of positive Darwinian selection and presence/absence polymorphism. *Genetics* **178**, 1533-1545.
- Houzelstein, D., Reyes-Gomez, E., Maurer, M., Netter, P. and Higuete, D. (2013). Expression patterns suggest that despite considerable functional redundancy, galectin-4 and -6 play distinct roles in normal and damaged mouse digestive tract. *J. Histochem. Cytochem.* **61**, 348-361.
- Hsu, D. K., Zuberi, R. I. and Liu, F. T. (1992). Biochemical and biophysical characterization of human recombinant IgE-binding protein, an S-type animal lectin. *J. Biol. Chem.* **267**, 14167-14174.
- Hufejt, M. E. and Leffler, H. (2004). Galectin-4 in normal tissues and cancer. *Glycoconj. J.* **20**, 247-255.
- Hufejt, M. E., Turck, C. W., Lindstedt, R., Barondes, S. H. and Leffler, H. (1993). L-29, a soluble lactose-binding lectin, is phosphorylated on serine 6 and serine 12 in vivo and by casein kinase I. *J. Biol. Chem.* **268**, 26712-26718.
- Hughes, R. C. (1999). Secretion of the galectin family of mammalian carbohydrate-binding proteins. *Biochim. Biophys. Acta* **1473**, 172-185.
- Hutter, S., Martin, N., von Schönfeldt, V., Messner, J., Kuhn, C., Hofmann, S., Andergassen, U., Knabl, J. and Jeschke, U. (2015). Galectin 2 (gal-2) expression is downregulated on protein and mRNA level in placentas of preeclamptic (PE) patients. *Placenta* **36**, 438-445.
- Ideo, H., Hoshi, I., Yamashita, K. and Sakamoto, M. (2013). Phosphorylation and externalization of galectin-4 is controlled by Src family kinases. *Glycobiology* **23**, 1452-1462.
- Inohara, H. and Raz, A. (1994). Effects of natural complex carbohydrate (citrus pectin) on murine melanoma cell properties related to galectin-3 functions. *Glycoconj. J.* **11**, 527-532.
- Ippel, H., Miller, M. C., Vértesy, S., Zheng, Y., Cañada, F. J., Suylen, D., Umemoto, K., Romanò, C., Hackeng, T., Tai, G. et al. (2016). Intra- and intermolecular interactions of human galectin-3: assessment by full-assignment-based NMR. *Glycobiology* **26**, 888-903.

- Jiang, P., Gan, M., Yen, S.-H., McLean, P. J. and Dickson, D. W. (2017). Impaired endo-lysosomal membrane integrity accelerates the seeding progression of alpha-synuclein aggregates. *Sci. Rep.* **7**, 7690.
- Johannes, L., Wunder, C. and Shafaq-Zadah, M. (2016). Glycolipids and lectins in endocytic uptake processes. *J. Mol. Biol.* **428**, 4792-4818.
- Kamili, N. A., Arthur, C. M., Gerner-Smidt, C., Tafesse, E., Blenda, A., Dias-Baruffi, M. and Stowell, S. R. (2016). Key regulators of galectin-glycan interactions. *Proteomics* **16**, 3111-3125.
- Kang, H. G., Kim, D. H., Kim, S. J., Cho, Y., Jung, J., Jang, W. and Chun, K. H. (2016). Galectin-3 supports stemness in ovarian cancer stem cells by activation of the Notch1 intracellular domain. *Oncotarget* **7**, 68229-68241.
- Kasai, K. (2006). Let's explore glycoland. *Trends Glycosci. Glycotech.* **18**, 93-102.
- Keryer-Bibens, C., Pioche-Durieu, C., Villemant, C., Souquère, S., Nishi, N., Hirashima, M., Middeldorp, J. and Busson, P. (2006). Exosomes released by EBV-infected nasopharyngeal carcinoma cells convey the viral latent membrane protein 1 and the immunomodulatory protein galectin 9. *BMC Cancer* **6**, 283.
- Kim, B.-W., Hong, S. B., Kim, J. H., Kwon, D. H. and Song, H. K. (2013). Structural basis for recognition of autophagic receptor NDP52 by the sugar receptor galectin-8. *Nat. Commun.* **4**, 1613.
- Koch, A., Poirier, F., Jacob, R. and Delacour, D. (2010). Galectin-3, a novel centrosome-associated protein, required for epithelial morphogenesis. *Mol. Biol. Cell* **21**, 219-231.
- Kong, X.-F., Vogt, G., Chappier, A., Lamaze, C., Bustamante, J., Prando, C., Fortin, A., Puel, A., Feinberg, J., Zhang, X.-X. et al. (2010). A novel form of cell type-specific partial IFN-gammaR1 deficiency caused by a germ line mutation of the IFNGR1 initiation codon. *Hum. Mol. Genet.* **19**, 434-444.
- Kuklinski, S. and Probstmeier, R. (1998). Homophilic binding properties of galectin-3: involvement of the carbohydrate recognition domain. *J. Neurochem.* **70**, 814-823.
- Kwon, D. H. and Song, H. K. (2018). A structural view of xenophagy, a battle between host and microbes. *Mol. Cells* **41**, 27-34.
- Lakshminarayan, R., Wunder, C., Becken, U., Howes, M. T., Benzing, C., Arumugam, S., Sales, S., Ariotti, N., Chambon, V., Lamaze, C. et al. (2014). Galectin-3 drives glycosphingolipid-dependent biogenesis of clathrin-independent carriers. *Nat. Cell Biol.* **16**, 595-606.
- Landegren, U., Al-Amin, R. A. and Björkstén, J. (2018). A myopic perspective on the future of protein diagnostics. *New Biotechnol.* doi:10.1016/j.nbt.2018.01.002.
- Lau, K. S., Partridge, E. A., Grigorian, A., Silvescu, C. I., Reinhold, V. N., Demetriou, M. and Dennis, J. W. (2007). Complex N-glycan number and degree of branching cooperate to regulate cell proliferation and differentiation. *Cell* **129**, 123-134.
- Lee, R. T. and Lee, Y. C. (2000). Affinity enhancement by multivalent lectin-carbohydrate interaction. *Glycoconj. J.* **17**, 543-551.
- Leffler, H. and Barondes, S. H. (1986). Specificity of binding of three soluble rat lung lectins to substituted and unsubstituted mammalian beta-galactosides. *J. Biol. Chem.* **261**, 10119-10126.
- Leffler, H., Carlsson, S., Hedlund, M., Qian, Y. and Poirier, F. (2004). Introduction to galectins. *Glycoconj. J.* **19**, 433-440.
- Lensch, M., Lohr, M., Russwurm, R., Vidal, M., Kaltner, H., André, S. and Gabius, H.-J. (2006). Unique sequence and expression profiles of rat galectins-5 and -9 as a result of species-specific gene divergence. *Int. J. Biochem. Cell. Biol.* **38**, 1741-1758.
- Leppänen, A., Stowell, S., Blixt, O. and Cummings, R. D. (2005). Dimeric galectin-1 binds with high affinity to alpha2,3-sialylated and non-sialylated terminal N-acetyllactosamine units on surface-bound extended glycans. *J. Biol. Chem.* **280**, 5549-5562.
- Lepur, A., Salomonsson, E., Nilsson, U. J. and Leffler, H. (2012). Ligand induced galectin-3 protein self-association. *J. Biol. Chem.* **287**, 21751-21756.
- Li, S., Wandel, M. P., Li, F., Liu, Z., He, C., Wu, J., Shi, Y. and Randow, F. (2013). Sterical hindrance promotes selectivity of the autophagy cargo receptor NDP52 for the danger receptor galectin-8 in antibacterial autophagy. *Sci. Signal.* **6**, ra9.
- Li, P., Liu, S., Lu, M., Bandyopadhyay, G., Oh, D., Imamura, T., Johnson, A. M. F., Sears, D., Shen, Z., Cui, B. et al. (2016). Hematopoietic-derived galectin-3 causes cellular and systemic insulin resistance. *Cell* **167**, 973-984.e12.
- Lindstedt, R., Apodaca, G., Barondes, S. H., Mostov, K. E. and Leffler, H. (1993). Apical secretion of a cytosolic protein by Madin-Darby canine kidney cells. Evidence for polarized release of an endogenous lectin by a nonclassical secretory pathway. *J. Biol. Chem.* **268**, 11750-11757.
- Liu, W., Hsu, D. K., Chen, H.-Y., Yang, R.-Y., Carraway, K. L., III, Isseroff, R. R. and Liu, F.-T. (2012). Galectin-3 regulates intracellular trafficking of EGFR through Alix and promotes keratinocyte migration. *J. Invest. Dermatol.* **132**, 2828-2837.
- Lundquist, J. J. and Toone, E. J. (2002). The cluster glycoside effect. *Chem. Rev.* **102**, 555-578.
- Magescas, J., Sengmanivong, L., Viau, A., Mayeux, A., Dang, T., Burtin, M., Nilsson, U. J., Leffler, H., Poirier, F., Terzi, F. et al. (2017). Spindle pole cohesion requires glycosylation-mediated localization of NuMA. *Sci. Rep.* **7**, 1474.
- Magnaldo, T., Fowles, D. and Darmon, M. (1998). Galectin-7, a marker of all types of stratified epithelia. *Differentiation* **63**, 159-168.
- Maier, O., Marvin, S. A., Wodrich, H., Campbell, E. M. and Wiethoff, C. M. (2012). Spatiotemporal dynamics of adenovirus membrane rupture and endosomal escape. *J. Virol.* **86**, 10821-10828.
- Manning, J. C., Caballero, G. G., Ruiz, F. M., Romero, A., Kaltner, H. and Gabius, H. J. (2018). Members of the galectin network with deviations from the canonical sequence signature. 2. Galectin-related protein (GRP). *Trends Glycosci. Glycotechnol.* **30**, SE11-SE20.
- Massa, S. M., Cooper, D. N. W., Leffler, H. and Barondes, S. H. (1993). L-29, an endogenous lectin, binds to glycoconjugate ligands with positive cooperativity. *Biochemistry* **32**, 260-267.
- Matsumoto, R., Matsumoto, H., Seki, M., Hata, M., Asano, Y., Kanegasaki, S., Stevens, R. L. and Hirashima, M. (1998). Human ecalectin, a variant of human galectin-9, is a novel eosinophil chemoattractant produced by T lymphocytes. *J. Biol. Chem.* **273**, 16976-16984.
- Méndez-Huergo, S. P., Blidner, A. G. and Rabinovich, G. A. (2017). Galectins: emerging regulatory checkpoints linking tumor immunity and angiogenesis. *Curr. Opin. Immunol.* **45**, 8-15.
- Michaud, S. and Reed, R. (1991). An ATP-independent complex commits pre-mRNA to the mammalian spliceosome assembly pathway. *Genes Dev.* **5**, 2534-2546.
- Miller, M. C., Klyosov, A. and Mayo, K. H. (2009). The alpha-galactomannan Davanat binds galectin-1 at a site different from the conventional galectin carbohydrate binding domain. *Glycobiology* **19**, 1034-1045.
- Miller, M. C., Klyosov, A. A. and Mayo, K. H. (2012). Structural features for alpha-galactomannan binding to galectin-1. *Glycobiology* **22**, 543-551.
- Miller, M. C., Ippel, H., Suylen, D., Klyosov, A. A., Traber, P. G., Hackeng, T. and Mayo, K. H. (2016). Binding of polysaccharides to human galectin-3 at a noncanonical site in its carbohydrate recognition domain. *Glycobiology* **26**, 88-99.
- Mishra, R., Grzybek, M., Niki, T., Hirashima, M. and Simons, K. (2010). Galectin-9 trafficking regulates apical-basal polarity in Madin-Darby canine kidney epithelial cells. *Proc. Natl. Acad. Sci. USA* **107**, 17633-17638.
- Morelle, W., Stechly, L., André, S., Van Seuningen, I., Porchet, N., Gabius, H.-J., Michalski, J.-C. and Huet, G. (2009). Glycosylation pattern of brush border-associated glycoproteins in enterocyte-like cells: involvement of complex-type N-glycans in apical trafficking. *Biol. Chem.* **390**, 529-544.
- Nabi, I. R., Shankar, J. and Dennis, J. W. (2015). The galectin lattice at a glance. *J. Cell Sci.* **128**, 2213-2219.
- Nakahara, S., Hogan, V., Inohara, H. and Raz, A. (2006). Importin-mediated nuclear translocation of galectin-3. *J. Biol. Chem.* **281**, 39649-39659.
- Nieminen, J., Kuno, A., Hirabayashi, J. and Sato, S. (2007). Visualization of galectin-3 oligomerization on the surface of neutrophils and endothelial cells using fluorescence resonance energy transfer. *J. Biol. Chem.* **282**, 1374-1383.
- Oka, T., Murakami, S., Arata, Y., Hirabayashi, J., Kasai, K.-I., Wada, Y. and Futai, M. (1999). Identification and cloning of rat galectin-2: expression is predominantly in epithelial cells of the stomach. *Arch. Biochem. Biophys.* **361**, 195-201.
- Paz, A., Haklai, R., Elad-Sfadia, G., Ballan, E. and Kloog, Y. (2001). Galectin-1 binds oncogenic H-Ras to mediate Ras membrane anchorage and cell transformation. *Oncogene* **20**, 7486-7493.
- Paz, I., Sachse, M., Dupont, N., Mounier, J., Cederfur, C., Enninga, J., Leffler, H., Poirier, F., Prevost, M.-C., Lafont, F. et al. (2010). Galectin-3, a marker for vacuole lysis by invasive pathogens. *Cell. Microbiol.* **12**, 530-544.
- Rajput, V. K., MacKinnon, A., Mandal, S., Collins, P., Blanchard, H., Leffler, H., Sethi, T., Schambye, H., Mukhopadhyay, B. and Nilsson, U. J. (2016). A selective galactose-coumarin-derived galectin-3 inhibitor demonstrates involvement of galectin-3-glycan interactions in a pulmonary fibrosis model. *J. Med. Chem.* **59**, 8141-8147.
- Sacchettini, J. C., Baum, L. G. and Brewer, C. F. (2001). Multivalent protein-carbohydrate interactions. A new paradigm for supermolecular assembly and signal transduction. *Biochemistry* **40**, 3009-3015.
- Salomonsson, E., Carlsson, M. C., Osla, V., Hendus-Altnerburger, R., Kahl-Knutson, B., Öberg, C. T., Sundin, A., Nilsson, R., Nordberg-Karlsson, E., Nilsson, U. J. et al. (2010a). Mutational tuning of galectin-3 specificity and biological function. *J. Biol. Chem.* **285**, 35079-35091.
- Salomonsson, E., Larumbe, A., Tejler, J., Tullberg, E., Rydberg, H., Sundin, A., Khabut, A., Frejd, T., Lobsanov, Y. D., Rini, J. M. et al. (2010b). Monovalent interactions of galectin-1. *Biochemistry* **49**, 9518-9532.
- Sato, M., Nishi, N., Shoji, H., Kumagai, M., Imaizumi, T., Hata, Y., Hirashima, M., Suzuki, S. and Nakamura, T. (2002). Quantification of galectin-7 and its localization in adult mouse tissues. *J. Biochem.* **131**, 255-260.
- Schneider, D., Greb, C., Koch, A., Straube, T., Elli, A., Delacour, D. and Jacob, R. (2010). Trafficking of galectin-3 through endosomal organelles of polarized and non-polarized cells. *Eur. J. Cell Biol.* **89**, 788-798.
- Sciacchitano, S., Lavra, L., Morgante, A., Ulivieri, A., Magi, F., De Francesco, G. P., Bellotti, C., Salehi, L. B. and Ricci, A. (2018). Galectin-3: one molecule for an alphabet of diseases, from A to Z. *Int. J. Mol. Sci.* **19**, 379.
- Seelenmeyer, C., Wegehling, S., Tews, I., Künzler, M., Aebi, M. and Nickel, W. (2005). Cell surface counter receptors are essential components of the unconventional export machinery of galectin-1. *J. Cell Biol.* **171**, 373-381.



- Shalom-Feuerstein, R., Plowman, S. J., Rotblat, B., Ariotti, N., Tian, T., Hancock, J. F. and Kloog, Y. (2008). K-ras nanoclustering is subverted by overexpression of the scaffold protein galectin-3. *Cancer Res.* **68**, 6608-6616.
- Shimura, T., Takenaka, Y., Fukumori, T., Tsutsumi, S., Okada, K., Hogan, V., Kikuchi, A., Kuwano, H. and Raz, A. (2005). Implication of galectin-3 in Wnt signaling. *Cancer Res.* **65**, 3535-3537.
- Sindrewicz, P., Lian, L.-Y. and Yu, L.-G. (2016). Interaction of the Oncofetal Thomsen-Friedenreich antigen with galectins in cancer progression and metastasis. *Front Oncol.* **6**, 79.
- Stechly, L., Morelle, W., Dessein, A.-F., André, S., Gard, G., Trinel, D., Dejonghe, M.-J., Leteurtre, E., Drobecq, H., Trugnan, G. et al. (2009). Galectin-4-regulated delivery of glycoproteins to the brush border membrane of enterocyte-like cells. *Traffic* **10**, 438-450.
- Stegmayr, J., Lepur, A., Kahl-Knutson, B., Aguilar-Moncayo, M., Klyosov, A. A., Field, R. A., Oredsson, S., Nilsson, U. J. and Leffler, H. (2016). Low or no inhibitory potency of the canonical galectin carbohydrate-binding site by Pectins and Galactomannans. *J. Biol. Chem.* **291**, 13318-13334.
- Stewart, S. E., Menzies, S. A., Popa, S. J., Savinykh, N., Petrunkina Harrison, A., Lehner, P. J. and Moreau, K. (2017). A genome-wide CRISPR screen reconciles the role of N-linked glycosylation in galectin-3 transport to the cell surface. *J. Cell Sci.* **130**, 3234-3247.
- Stowell, S. R., Cho, M., Feasley, C. L., Arthur, C. M., Song, X., Colucci, J. K., Karmakar, S., Mehta, P., Dias-Baruffi, M., McEver, R. P. et al. (2009). Ligand reduces galectin-1 sensitivity to oxidative inactivation by enhancing dimer formation. *J. Biol. Chem.* **284**, 4989-4999.
- Straube, T., von Mach, T., Hönig, E., Greb, C., Schneider, D. and Jacob, R. (2013). pH-dependent recycling of galectin-3 at the apical membrane of epithelial cells. *Traffic* **14**, 1014-1027.
- Than, N. G., Pick, E., Bellyei, S., Szigeti, A., Burger, O., Berente, Z., Janaky, T., Boronkai, A., Kliman, H., Meiri, H. et al. (2004). Functional analyses of placental protein 13/galectin-13. *Eur. J. Biochem.* **271**, 1065-1078.
- Than, N. G., Romero, R., Goodman, M., Weckle, A., Xing, J., Dong, Z., Xu, Y., Tarquini, F., Szilagyi, A., Gal, P. et al. (2009). A primate subfamily of galectins expressed at the maternal-fetal interface that promote immune cell death. *Proc. Natl. Acad. Sci. USA* **106**, 9731-9736.
- Thery, C., Boussac, M., Veron, P., Ricciardi-Castagnoli, P., Raposo, G., Garin, J. and Amigorena, S. (2001). Proteomic analysis of dendritic cell-derived exosomes: a secreted subcellular compartment distinct from apoptotic vesicles. *J. Immunol.* **166**, 7309-7318.
- Thiemann, S. and Baum, L. G. (2016). Galectins and immune responses-just how do they do those things they do? *Annu. Rev. Immunol.* **34**, 243-264.
- Thurston, T. L. M., Wandel, M. P., von Muhlinen, N., Foeglein, A. and Randow, F. (2012). Galectin 8 targets damaged vesicles for autophagy to defend cells against bacterial invasion. *Nature* **482**, 414-418.
- Timmons, P. M., Colnot, C., Cail, I., Poirier, F. and Magnaldo, T. (1999). Expression of galectin-7 during epithelial development coincides with the onset of stratification. *Int. J. Dev. Biol.* **43**, 229-235.
- Traber, P. G. and Zomer, E. (2013). Therapy of experimental NASH and fibrosis with galectin inhibitors. *PLoS ONE* **8**, e83481.
- Tsay, Y. G., Lin, N. Y., Voss, P. G., Patterson, R. J. and Wang, J. L. (1999). Export of galectin-3 from nuclei of digitonin-permeabilized mouse 3T3 fibroblasts. *Exp. Cell Res.* **252**, 250-261.
- Velasco, S., Díez-Revuelta, N., Hernández-Iglesias, T., Kaltner, H., André, S., Gabius, H.-J. and Abad-Rodríguez, J. (2013). Neuronal Galectin-4 is required for axon growth and for the organization of axonal membrane L1 delivery and clustering. *J. Neurochem.* **125**, 49-62.
- von Mach, T., Carlsson, M. C., Straube, T., Nilsson, U., Leffler, H. and Jacob, R. (2014). Ligand binding and complex formation of galectin-3 is modulated by pH variations. *Biochem. J.* **457**, 107-115.
- Vyakarnam, A., Dagher, S. F., Wang, J. L. and Patterson, R. J. (1997). Evidence for a role for galectin-1 in pre-mRNA splicing. *Mol. Cell. Biol.* **17**, 4730-4737.
- Wada, J., Ota, K., Kumar, A., Wallner, E. I. and Kanwar, Y. S. (1997). Developmental regulation, expression, and apoptotic potential of galectin-9, a beta-galactoside binding lectin. *J. Clin. Invest.* **99**, 2452-2461.
- Wang, W., Park, J. W., Wang, J. L. and Patterson, R. J. (2006). Immunoprecipitation of spliceosomal RNAs by antisera to galectin-1 and galectin-3. *Nucleic Acids Res.* **34**, 5166-5174.
- Wang, S.-F., Tsao, C.-H., Lin, Y.-T., Hsu, D. K., Chiang, M.-L., Lo, C.-H., Chien, F.-C., Chen, P., Arthur Chen, Y.-M., Chen, H.-Y. et al. (2014). Galectin-3 promotes HIV-1 budding via association with Alix and Gag p6. *Glycobiology* **24**, 1022-1035.
- Welton, J. L., Khanna, S., Giles, P. J., Brennan, P., Brewis, I. A., Staffurth, J., Mason, M. D. and Clayton, A. (2010). Proteomics analysis of bladder cancer exosomes. *Mol. Cell. Proteomics* **9**, 1324-1338.
- Wittrup, A., Ai, A., Liu, X., Hamar, P., Trifonova, R., Charisse, K., Manoharan, M., Kirchhausen, T. and Lieberman, J. (2015). Visualizing lipid-formulated siRNA release from endosomes and target gene knockdown. *Nat. Biotechnol.* **33**, 870-876.
- Yang, R.-Y., Hill, P. N., Hsu, D. K. and Liu, F.-T. (1998). Role of the carboxyl-terminal lectin domain in self-association of galectin-3. *Biochemistry* **37**, 4086-4092.
- Yang, R.-Y., Hsu, D. K., Yu, L., Chen, H.-Y. and Liu, F.-T. (2004). Galectin-12 is required for adipogenic signaling and adipocyte differentiation. *J. Biol. Chem.* **279**, 29761-29766.
- Young, A. R., Barcham, G. J., Kemp, J. M., Dunphy, J. L., Nash, A. and Meeusen, E. N. (2009). Functional characterization of an eosinophil-specific galectin, ovine galectin-14. *Glycoconj. J.* **26**, 423-432.
- Young, A. R., Barcham, G. J., McWilliam, H. E., Piedrafita, D. M. and Meeusen, E. N. (2012). Galectin secretion and binding to adult *Fasciola hepatica* during chronic liver fluke infection of sheep. *Vet. Immunol. Immunopathol.* **145**, 362-367.
- Zetterberg, F. R., Peterson, K., Johnsson, R., Brimert, T., Hakansson, M., Logan, D. T., Leffler, H. and Nilsson, U. J. (2017). Monosaccharide derivatives with low-nanomolar lectin affinity and high selectivity based on combined fluorine-amide, phenyl-arginine, sulfur-pi, and halogen bond interactions. *ChemMedChem.* **13**, 133-137.
- Zhang, T., Miller, M. C., Zheng, Y., Zhang, Z., Xue, H., Zhao, D., Su, J., Mayo, K. H., Zhou, Y. and Tai, G. (2017). Macromolecular assemblies of complex polysaccharides with galectin-3 and their synergistic effects on function. *Biochem. J.* **474**, 3849-3868.
